# Supplementary material for: Kinetic Study of Nonequilibrium Plasma‐Assisted Methane Steam Reforming
Source: Hindawi journal article supplement (doi:10.1155/2014/938618), 2014-01-01
Supplement: f1 [file 938618.f1.pdf]

# **Kinetic Study of Non-Equilibrium Plasma-Assisted Methane Steam Reforming**

Hongtao Zheng\*, Qian Liu

(College of Power and Energy Engineering, Harbin Engineering University, Harbin 150001, China)

[zhenghongtao9000@163.com](mailto:zhenghongtao9000@163.com)

## Supporting Information

Appendix A: Electron-impact reactions and the rate constants ..... S3

Appendix B: Radical reactions and the rate constants..... S4

## Appendix A:

### Electron-impact reactions and rate constants<sup>1</sup>

| no. | reactions                                | Threshold | $A_r$    | $\beta_r$ | $E_r$    |
|-----|------------------------------------------|-----------|----------|-----------|----------|
| 1   | $E + CH_4 \Rightarrow E + CH_4$          | 0.162     | 5.08E-07 | -2.82E-01 | 5.97E+04 |
| 2   | $E + CH_4 \Rightarrow E + CH_4$          | 0.361     | 1.26E-04 | -7.45E-01 | 8.56E+04 |
| 3   | $E + CH_4 \Rightarrow E + CH_3 + H$      | 9.00      | 2.29E-04 | -7.17E-01 | 2.95E+05 |
| 4   | $E + CH_4 \Rightarrow E + CH_2 + H_2$    | 10.00     | 3.47E-03 | -9.59E-01 | 3.44E+05 |
| 5   | $E + CH_4 \Rightarrow E + CH + H_2 + H$  | 11.00     | 6.67E-06 | -4.83E-01 | 3.05E+05 |
| 6   | $E + CH_4 \Rightarrow E + C + 2H_2$      | 12.00     | 1.90E-05 | -5.78E-01 | 3.35E+05 |
| 7   | $E + H_2O \Rightarrow E + H_2O$          | 0.206     | 1.01E-08 | -6.71E-01 | 4.73E+03 |
| 8   | $E + H_2O \Rightarrow E + H_2O$          | 0.459     | 6.65E-09 | 8.19E-02  | 2.20E+04 |
| 9   | $E + H_2O \Rightarrow E + H_2O$          | 1.058     | 1.04E-08 | -6.37E-02 | 4.86E+04 |
| 10  | $E + H_2O \Rightarrow E + H_2O$          | 8.445     | 2.42E-07 | -1.76E-01 | 2.43E+05 |
| 11  | $E + H_2O \Rightarrow E + H_2O$          | 14.052    | 5.98E-07 | -2.22E-01 | 4.35E+05 |
| 12  | $E + H_2O \Rightarrow E + OH + H$        | 7.00      | 4.29E-09 | 1.20E-01  | 1.91E+05 |
| 13  | $E + H_2O \Rightarrow O + H_2 + E$       | 13.00     | 5.01E-09 | 1.20E-01  | 3.93E+05 |
| 14  | $E + C_2H_6 \Rightarrow CH_3 + CH_3 + E$ | 7.53      | 9.22E-09 | 1.71E-01  | 1.66E+05 |
| 15  | $E + C_2H_6 \Rightarrow C_2H_5 + H + E$  | 10.12     | 1.81E-06 | -1.92E-01 | 2.88E+05 |
| 16  | $E + C_2H_4 \Rightarrow CH_2 + CH_2 + E$ | 7.462     | 1.86E-08 | 5.95E-02  | 1.75E+05 |
| 17  | $E + C_2H_4 \Rightarrow C_2H_3 + H + E$  | 5.00      | 2.46E-10 | 4.95E-01  | 1.24E+05 |
| 18  | $E + C_2H_2 \Rightarrow CH + CH + E$     | 7.902     | 3.34E-06 | -2.77E-01 | 1.67E+05 |
| 19  | $E + C_2H_2 \Rightarrow C_2H + H + E$    | 5.089     | 1.90E-03 | -1.05E+00 | 1.49E+05 |
| 20  | $E + CH_4 \Rightarrow CH_4^+ + 2E$       | 13.00     | 2.13E-08 | 1.20E-01  | 3.59E+05 |
| 21  | $E + CH_4 \Rightarrow CH_3^+ + H + 2E$   | 14.3      | 2.20E-08 | 1.20E-01  | 4.08E+05 |
| 22  | $E + CH_4 \Rightarrow CH_3 + H^-$        | 7.7       | 1.60E+01 | -2.35E+00 | 2.52E+05 |
| 23  | $E + CH_4 \Rightarrow CH_2^- + H_2$      | 9.00      | 1.35E+01 | -2.39E+00 | 2.90E+05 |
| 24  | $E + H_2O \Rightarrow OH^- + H$          | 3.28      | 6.99E-10 | -3.35E-01 | 9.34E+04 |
| 25  | $E + H_2O \Rightarrow H^- + OH$          | 4.36      | 5.36E-04 | -1.26E+00 | 1.08E+05 |
| 26  | $E + H_2O \Rightarrow H_2 + O^-$         | 3.58      | 3.34E-05 | -1.13E+00 | 1.44E+05 |
| 27  | $E + CH_3 \Rightarrow CH_3^+ + 2E$       | 10.0      | 8.53E-11 | 5.19E-01  | 1.99E+05 |

<sup>1</sup>Reaction rate coefficient  $k_r = A_r T^{\beta_r} \exp(-E_r/T)$ , Units:  $A_r$ , cm<sup>3</sup>·molecules<sup>-1</sup>·s<sup>-1</sup>·K;  $\beta_r$ , dimensionless;  $E_r$ , (Ea/R), K.

|    |                                      |      |          |           |          |
|----|--------------------------------------|------|----------|-----------|----------|
| 28 | $E + CH_3 \Rightarrow CH_2 + H + 2E$ | 15.0 | 1.38E-08 | 3.54E-01  | 2.47E+01 |
| 29 | $E + CH_2 \Rightarrow CH_2 + 2E$     | 11.0 | 2.31E-10 | 4.42E-01  | 2.15E+05 |
| 30 | $E + CH \Rightarrow CH + H + 2E$     | 16.0 | 1.72E-10 | 4.00E-01  | 2.99E+05 |
| 31 | $E + CH \Rightarrow CH + 2E$         | 11.0 | 6.16E-10 | 3.65E-01  | 2.30E+05 |
| 32 | $E + CH \Rightarrow C + H + 2E$      | 16.0 | 9.24E-11 | 4.18E-01  | 3.16E+05 |
| 33 | $E + H_2 \Rightarrow H + H + E$      | 8.90 | 9.91E-04 | -9.37E-01 | 2.31E+05 |

## Appendix B:

### Radical reactions and rate constants

| no. | reactions                                | $A_r$    | $\beta_r$ | $E_r$  | no. | reactions                                     | $A_r$    | $\beta_r$ | $E_r$   |
|-----|------------------------------------------|----------|-----------|--------|-----|-----------------------------------------------|----------|-----------|---------|
| 34  | $CH_3 + CH_2 \Rightarrow C_2H_4 + H$     | 1.50E-07 | -1.17     | 320.0  | 105 | $C_2H_5 + CH_3OH \Rightarrow C_2H_6 + CH_3O$  | 2.39E-23 | 3.10      | 4500.0  |
| 35  | $CH_3 + H \Rightarrow H_2 + CH_2$        | 7.01E-11 | 0.00      | 0.0    | 106 | $C_2H_5 + CH_3O \Rightarrow C_2H_6 + CH_2O$   | 4.00E-11 | 0.00      | 0.0     |
| 36  | $CH_3 + H \Rightarrow CH_4$              | 1.00E-10 | 0.00      | 7600.0 | 107 | $C_2H_5 + CH_2O \Rightarrow C_2H_6 + HCO$     | 9.14E-21 | 2.81      | 2950.0  |
| 37  | $CH_2 + CH_2 \Rightarrow C_2H_2 + H_2$   | 2.01E-09 | -0.40     | 0.0    | 108 | $C_2H_5 + HCO \Rightarrow C_2H_6 + CO$        | 2.01E-10 | 0.00      | 0.0     |
| 38  | $CH_2 + H \Rightarrow CH + H_2$          | 2.62E-09 | 0.00      | 6010.0 | 109 | $C_2H_5 + O \Rightarrow CH_2O + CH_3$         | 2.67E-11 | 0.00      | 0.0     |
| 39  | $CH_3 + OH \Rightarrow CH_3OH$           | 1.00E-11 | 0.00      | -900.0 | 110 | $C_2H_5 + O \Rightarrow C_2H_4 + OH$          | 6.31E-12 | 0.00      | 0.0     |
| 40  | $CH_2 + OH \Rightarrow CH_2O + H$        | 1.04E-10 | -0.02     | -16.8  | 111 | $C_2H_3 + C_2H_6 \Rightarrow C_2H_4 + C_2H_5$ | 9.99E-22 | 3.30      | 5280.0  |
| 41  | $CH + H \Rightarrow C + H_2$             | 3.01E-11 | 0.00      | 0.0    | 112 | $C_2H_3 + C_2H_3 \Rightarrow C_2H_4 + C_2H_2$ | 1.60E-12 | 0.00      | 0.0     |
| 42  | $CH_3OH + OH \Rightarrow CH_3O + H_2O$   | 1.31E-10 | 0.00      | 80.6   | 113 | $C_2H_3 \Rightarrow C_2H_2 + H$               | 6.81E+17 | -7.49     | 22900.0 |
| 43  | $CH_3OH + CH_2 \Rightarrow CH_3O + CH_3$ | 2.88E-23 | 3.40      | -575.0 | 114 | $C_2H_5 \Rightarrow C_2H_4 + H$               | 3.06E+10 | 0.95      | 18600.0 |
| 44  | $CH_3OH + CH_3 \Rightarrow CH_3O + CH_4$ | 2.39E-23 | 3.10      | 3490.0 | 115 | $C_2H_3 + CH_4 \Rightarrow C_2H_4 + CH_3$     | 2.41E-24 | 4.02      | 2750.0  |
| 45  | $CH_3O + H \Rightarrow CH_3OH$           | 2.39E-23 | 3.10      | 3490.0 | 116 | $C_2H_3 + CH_3 \Rightarrow C_2H_2 + CH_4$     | 1.24E-03 | -3.20     | 0.0     |
| 46  | $CH_3O + OH \Rightarrow CH_2O + H_2O$    | 4.05E-11 | 0.24      | -26.5  | 117 | $C_2H_3 + CH_3 \Rightarrow C_3H_6$            | 1.20E-10 | 0.00      | 0.0     |
| 47  | $CH_3O + CH_3 \Rightarrow CH_2O + CH_4$  | 3.01E-11 | 0.00      | 0.0    | 118 | $C_2H_3 + CH_2 \Rightarrow C_2H_2 + CH_3$     | 3.01E-11 | 0.00      | 0.0     |
| 48  | $CH_3O + CH_4 \Rightarrow CH_3OH + CH_3$ | 4.00E-11 | 0.00      | 0.0    | 119 | $C_2H_3 + CH_3OH \Rightarrow C_2H_4 + CH_3O$  | 2.39E-23 | 3.10      | 3490.0  |
| 49  | $CH_3O + CH_2 \Rightarrow CH_2O + CH_3$  | 2.61E-13 | 0.00      | 4450.0 | 120 | $C_2H_3 + CH_3O \Rightarrow CH_2O + C_2H_4$   | 4.00E-11 | 0.00      | 0.0     |
| 50  | $CH_2O + CH_2 \Rightarrow CH_3 + HCO$    | 3.01E-11 | 0.00      | 0.0    | 121 | $C_2H_3 + CH_2O \Rightarrow C_2H_4 + HCO$     | 6.40E-21 | 2.87      | 2950.0  |
| 51  | $CH_2O + CH_3 \Rightarrow CH_4 + HCO$    | 1.00E-14 | 0.00      | 0.0    | 122 | $C_2H_3 + HCO \Rightarrow C_2H_4 + CO$        | 5.00E-07 | 0.00      | 0.0     |
| 52  | $CH_2O + H \Rightarrow H_2 + HCO$        | 1.29E-31 | 6.10      | 990.0  | 123 | $C_2H_3 + H \Rightarrow C_2H_4$               | 6.46E-11 | 0.20      | 0.0     |
| 53  | $CH_2O + OH \Rightarrow HCO + H_2O$      | 3.79E-14 | 1.05      | 1650.0 | 124 | $C_2H_3 + H \Rightarrow C_2H_2 + H_2$         | 2.01E-11 | 0.00      | 0.0     |
| 54  | $HCO + H \Rightarrow CO + H_2$           | 5.69E-15 | 1.18      | -225.0 | 125 | $C_2H_3 + OH \Rightarrow C_2H_2 + H_2O$       | 5.00E-11 | 0.00      | 0.0     |
| 55  | $HCO + OH \Rightarrow CO + H_2O$         | 1.50E-10 | 0.00      | 0.0    | 126 | $C_2H_3 + O \Rightarrow C_2H_2 + OH$          | 1.76E-12 | 0.20      | -215.0  |

|    |                                                                                                       |          |      |         |     |                                                                                            |          |       |         |
|----|-------------------------------------------------------------------------------------------------------|----------|------|---------|-----|--------------------------------------------------------------------------------------------|----------|-------|---------|
| 56 | $\text{HCO} + \text{CH}_4 \Rightarrow \text{CH}_2\text{O} + \text{CH}_3$                              | 1.69E-10 | 0.00 | 0.0     | 127 | $\text{C}_2\text{H}_4 + \text{CH}_2 \Rightarrow \text{C}_3\text{H}_6$                      | 5.00E-17 | 0.00  | 0.0     |
| 57 | $\text{HCO} + \text{CH}_3 \Rightarrow \text{CH}_4 + \text{CO}$                                        | 1.06E-24 | 3.78 | 10700.0 | 128 | $\text{C}_2\text{H}_2 + \text{H} \Rightarrow \text{C}_2\text{H} + \text{H}_2$              | 1.00E-10 | 0.00  | 11200.0 |
| 58 | $\text{HCO} + \text{CH}_2 \Rightarrow \text{CO} + \text{CH}_3$                                        | 2.01E-10 | 0.00 | 0.0     | 129 | $\text{CH}_4 + \text{H} \Rightarrow \text{H}_2 + \text{CH}_3$                              | 6.62E-21 | 3.16  | 4410.0  |
| 59 | $\text{HCO} + \text{H}_2\text{O} \Rightarrow \text{CH}_2\text{O} + \text{OH}$                         | 3.01E-11 | 0.00 | 0.0     | 130 | $\text{CH}_4 + \text{OH} \Rightarrow \text{CH}_3 + \text{H}_2\text{O}$                     | 1.68E-18 | 2.18  | 1230.0  |
| 60 | $\text{O} + \text{C}_2\text{H}_4 \Rightarrow \text{CH}_3 + \text{HCO}$                                | 3.86E-16 | 1.35 | 13100.0 | 131 | $\text{CH}_4 + \text{CH}_2 \Rightarrow \text{CH}_3 + \text{CH}_3$                          | 3.01E-19 | 0.00  | 0.0     |
| 61 | $\text{O} + \text{C}_2\text{H}_2 \Rightarrow \text{CO} + \text{CH}_2$                                 | 2.19E-16 | 1.55 | 215.0   | 132 | $\text{CO}_2 + \text{CH}_2 \Rightarrow \text{CH}_2\text{O} + \text{CO}$                    | 3.90E-14 | 0.00  | 0.0     |
| 62 | $\text{O} + \text{CH}_4 \Rightarrow \text{CH}_3 + \text{OH}$                                          | 6.78E-16 | 1.50 | 850.0   | 133 | $\text{CO}_2 + \text{H} \Rightarrow \text{CO} + \text{OH}$                                 | 2.51E-10 | 0.00  | 13400.0 |
| 63 | $\text{O} + \text{CH}_3 \Rightarrow \text{CH}_2\text{O} + \text{H}$                                   | 1.15E-16 | 1.56 | 4270.0  | 134 | $\text{CO} + \text{C}_2\text{H}_4 \Rightarrow \text{C}_2\text{H}_3 + \text{HCO}$           | 2.51E-10 | 0.00  | 45600.0 |
| 64 | $\text{O} + \text{CH}_3 \Rightarrow \text{CH}_3\text{O}$                                              | 1.40E-09 | 0.00 | 0.0     | 135 | $\text{CO} + \text{CH}_3\text{O} \Rightarrow \text{CO}_2 + \text{CH}_3$                    | 2.61E-11 | 0.00  | 5940.0  |
| 65 | $\text{O} + \text{CH} \Rightarrow \text{CO} + \text{H}$                                               | 9.18E-11 | 0.05 | -68.6   | 136 | $\text{CO} + \text{OH} \Rightarrow \text{CO}_2 + \text{H}$                                 | 1.05E-17 | 1.50  | -250.0  |
| 66 | $\text{O} + \text{CH} \Rightarrow \text{C} + \text{OH}$                                               | 6.59E-11 | 0.00 | 0.0     | 137 | $\text{H}_2 + \text{C}_2\text{H}_5 \Rightarrow \text{C}_2\text{H}_6 + \text{H}$            | 5.10E-24 | 3.60  | 4250.0  |
| 67 | $\text{O} + \text{CH}_3\text{OH} \Rightarrow \text{CH}_3\text{O} + \text{OH}$                         | 2.52E-11 | 0.00 | 2380.0  | 138 | $\text{H}_2 + \text{C}_2\text{H}_4 \Rightarrow \text{C}_2\text{H}_5 + \text{H}$            | 1.69E-11 | 0.00  | 34300.0 |
| 68 | $\text{O} + \text{CH}_3\text{O} \Rightarrow \text{CH}_2\text{O} + \text{OH}$                          | 1.66E-11 | 0.00 | 2360.0  | 139 | $\text{H}_2 + \text{C}_2\text{H}_2 \Rightarrow \text{C}_2\text{H}_4$                       | 5.00E-13 | 0.00  | 19600.0 |
| 69 | $\text{O} + \text{CH}_2\text{O} \Rightarrow \text{HCO} + \text{OH}$                                   | 1.00E-11 | 0.00 | 0.0     | 140 | $\text{H}_2 + \text{C}_2\text{H}_2 \Rightarrow \text{C}_2\text{H}_3 + \text{H}$            | 4.00E-12 | 0.00  | 32700.0 |
| 70 | $\text{O} + \text{HCO} \Rightarrow \text{CO} + \text{OH}$                                             | 6.92E-13 | 0.57 | 1390.0  | 141 | $\text{H}_2 + \text{CH}_3 \Rightarrow \text{CH}_4 + \text{H}$                              | 1.14E-20 | 2.74  | 4740.0  |
| 71 | $\text{O} + \text{HCO} \Rightarrow \text{CO}_2 + \text{H}$                                            | 5.00E-11 | 0.00 | 0.0     | 142 | $\text{H}_2 + \text{CH}_2 \Rightarrow \text{CH}_3 + \text{H}$                              | 5.00E-15 | 0.00  | 0.0     |
| 72 | $\text{O} + \text{H}_2\text{O} \Rightarrow \text{OH} + \text{OH}$                                     | 4.98E-11 | 0.00 | 0.0     | 143 | $\text{H}_2 + \text{CH} \Rightarrow \text{CH}_3$                                           | 8.93E-11 | 0.15  | 0.0     |
| 73 | $\text{C}_2\text{H}_6 + \text{H} \Rightarrow \text{C}_2\text{H}_5 + \text{H}_2$                       | 8.21E-14 | 0.95 | 8570.0  | 144 | $\text{H}_2 + \text{CH} \Rightarrow \text{CH}_2 + \text{H}$                                | 5.51E-16 | 1.79  | 840.0   |
| 74 | $\text{C}_2\text{H}_6 + \text{OH} \Rightarrow \text{C}_2\text{H}_5 + \text{H}_2\text{O}$              | 5.19E-22 | 3.50 | 2600.0  | 145 | $\text{H}_2 + \text{CH}_3\text{O} \Rightarrow \text{CH}_3\text{OH} + \text{H}$             | 2.11E-25 | 4.00  | 2470.0  |
| 75 | $\text{C}_2\text{H}_6 + \text{O} \Rightarrow \text{C}_2\text{H}_5 + \text{OH}$                        | 2.74E-18 | 2.22 | 373.0   | 146 | $\text{H}_2 + \text{CH}_2\text{O} \Rightarrow \text{CH}_3\text{OH}$                        | 2.28E-11 | 0.00  | 35100.0 |
| 76 | $\text{C}_2\text{H}_6 + \text{CH}_3 \Rightarrow \text{C}_2\text{H}_5 + \text{CH}_4$                   | 1.66E-15 | 1.50 | 2920.0  | 147 | $\text{H}_2 + \text{HCO} \Rightarrow \text{CH}_2\text{O} + \text{H}$                       | 3.00E-18 | 2.00  | 8970.0  |
| 77 | $\text{C}_2\text{H}_6 + \text{CH}_2 \Rightarrow \text{C}_2\text{H}_5 + \text{CH}_3$                   | 9.12E-25 | 4.00 | 4170.0  | 148 | $\text{H}_2 + \text{OH} \Rightarrow \text{H}_2\text{O} + \text{H}$                         | 3.50E-16 | 1.52  | 1740.0  |
| 78 | $\text{C}_2\text{H}_6 + \text{CH}_3\text{O} \Rightarrow \text{CH}_3\text{OH} + \text{C}_2\text{H}_5$  | 1.07E-11 | 0.00 | 3980.0  | 149 | $\text{H}_2 + \text{O} \Rightarrow \text{OH} + \text{H}$                                   | 8.52E-20 | 2.67  | 3160.0  |
| 79 | $\text{C}_2\text{H}_6 + \text{HCO} \Rightarrow \text{CH}_2\text{O} + \text{C}_2\text{H}_5$            | 4.00E-11 | 0.00 | 3570.0  | 150 | $\text{H}_2\text{O} + \text{C}_2\text{H}_5 \Rightarrow \text{C}_2\text{H}_6 + \text{OH}$   | 5.64E-18 | 1.44  | 10200.0 |
| 80 | $\text{C}_2\text{H}_6 + \text{CH}_2 \Rightarrow \text{C}_3\text{H}_8$                                 | 3.74E-24 | 3.74 | 8520.0  | 151 | $\text{H}_2\text{O} + \text{C}_2\text{H}_3 \Rightarrow \text{C}_2\text{H}_4 + \text{OH}$   | 8.02E-22 | 2.90  | 7480.0  |
| 81 | $\text{C}_2\text{H}_4 + \text{C}_2\text{H}_2 \Rightarrow \text{C}_2\text{H}_3 + \text{C}_2\text{H}_3$ | 4.80E-12 | 0.00 | 0.0     | 152 | $\text{H}_2\text{O} + \text{CH}_3 \Rightarrow \text{CH}_4 + \text{OH}$                     | 8.02E-22 | 2.90  | 7480.0  |
| 82 | $\text{C}_2\text{H}_4 + \text{H} \Rightarrow \text{C}_2\text{H}_5$                                    | 4.00E-11 | 0.00 | 34400.0 | 153 | $\text{H}_2\text{O} + \text{CH}_2 \Rightarrow \text{CH}_3 + \text{OH}$                     | 1.60E-16 | 0.00  | 0.0     |
| 83 | $\text{C}_2\text{H}_4 + \text{OH} \Rightarrow \text{C}_2\text{H}_3 + \text{H}_2\text{O}$              | 4.20E-16 | 1.75 | 605.0   | 154 | $\text{H}_2\text{O} + \text{CH}_3\text{O} \Rightarrow \text{CH}_3\text{OH} + \text{OH}$    | 5.79E-25 | 3.80  | 5780.0  |
| 84 | $\text{C}_2\text{H}_4 + \text{H} \Rightarrow \text{C}_2\text{H}_3 + \text{H}_2$                       | 2.61E-20 | 2.75 | 2100.0  | 155 | $\text{H}_2\text{O} + \text{H} \Rightarrow \text{H}_2 + \text{OH}$                         | 7.50E-16 | 1.60  | 9720.0  |
| 85 | $\text{C}_2\text{H}_4 + \text{CH}_3 \Rightarrow \text{CH}_4 + \text{C}_2\text{H}_3$                   | 2.20E-18 | 2.53 | 6160.0  | 156 | $\text{H} + \text{H} \Rightarrow \text{H}_2$                                               | 1.80E-30 | -1.00 | 0.0     |
| 86 | $\text{C}_2\text{H}_2 + \text{H} \Rightarrow \text{C}_2\text{H}_3$                                    | 1.10E-23 | 3.70 | 4780.0  | 157 | $\text{H} + \text{OH} \Rightarrow \text{H}_2\text{O}$                                      | 4.26E-11 | 0.23  | -57.7   |
| 87 | $\text{C}_2\text{H}_2 + \text{OH} \Rightarrow \text{CO} + \text{CH}_3$                                | 9.13E-12 | 0.00 | 1220.0  | 158 | $\text{H} + \text{OH} \Rightarrow \text{H}_2 + \text{O}$                                   | 8.10E-21 | 2.80  | 1950.0  |
| 88 | $\text{CH}_3 + \text{CH}_2 \Rightarrow \text{C}_2\text{H}_4 + \text{H}$                               | 8.04E-28 | 4.00 | -1010.0 | 159 | $\text{H} + \text{O} \Rightarrow \text{OH}$                                                | 1.30E-29 | -1.00 | 0.0     |
| 89 | $\text{C}_2\text{H}_2 + \text{CH}_3\text{O} \Rightarrow \text{CH}_2\text{O} + \text{C}_2\text{H}_3$   | 1.20E-12 | 0.00 | 4530.0  | 160 | $\text{C}_3\text{H}_8 + \text{H} \Rightarrow \text{N}^* \text{C}_3\text{H}_7 + \text{H}_2$ | 2.20E-17 | 2.54  | 3400.0  |

|     |                                                                                                       |          |      |         |     |                                                                                                     |          |       |        |
|-----|-------------------------------------------------------------------------------------------------------|----------|------|---------|-----|-----------------------------------------------------------------------------------------------------|----------|-------|--------|
| 90  | $\text{HCO} + \text{HCO} \Rightarrow \text{CH}_2\text{O} + \text{CO}$                                 | 3.01E-11 | 0.00 | 0.0     | 161 | $\text{C}_3\text{H}_8 + \text{H} \Rightarrow \text{I}^* \text{C}_3\text{H}_7 + \text{H}_2$          | 2.17E-18 | 2.40  | 2250.0 |
| 91  | $\text{CH}_3\text{O} \Rightarrow \text{CH}_2\text{O} + \text{H}$                                      | 9.00E-11 | 0.00 | 6790.0  | 162 | $\text{C}_3\text{H}_8 + \text{OH} \Rightarrow \text{N}^* \text{C}_3\text{H}_7 + \text{H}_2\text{O}$ | 3.79E-12 | 0.00  | 1310.0 |
| 92  | $\text{CH}_2\text{O} \Rightarrow \text{CO} + \text{H}_2$                                              | 3.49E-09 | 0.00 | 17600.0 | 163 | $\text{C}_3\text{H}_8 + \text{OH} \Rightarrow \text{I}^* \text{C}_3\text{H}_7 + \text{H}_2\text{O}$ | 4.83E-15 | 1.00  | 130.0  |
| 93  | $\text{CH}_3\text{OH} \Rightarrow \text{CH}_3\text{O} + \text{H}$                                     | 1.19E+07 | 2.39 | 50200.0 | 164 | $\text{C}_3\text{H}_8 + \text{O} \Rightarrow \text{N}^* \text{C}_3\text{H}_7 + \text{OH}$           | 3.20E-19 | 2.68  | 1870.0 |
| 94  | $\text{C}_2\text{H}_5 + \text{C}_2\text{H}_5 \Rightarrow \text{C}_2\text{H}_6 + \text{C}_2\text{H}_4$ | 2.37E-12 | 0.00 | 0.0     | 165 | $\text{C}_3\text{H}_8 + \text{O} \Rightarrow \text{I}^* \text{C}_3\text{H}_7 + \text{OH}$           | 7.93E-20 | 2.71  | 1060.0 |
| 95  | $\text{C}_2\text{H}_5 + \text{C}_2\text{H}_4 \Rightarrow \text{C}_2\text{H}_6 + \text{C}_2\text{H}_3$ | 1.05E-21 | 3.13 | 9060.0  | 166 | $\text{N}^* \text{C}_3\text{H}_7 + \text{H} \Rightarrow \text{C}_3\text{H}_6 + \text{H}_2$          | 3.01E-11 | 0.00  | 0.0    |
| 96  | $\text{C}_2\text{H}_5 + \text{CH}_4 \Rightarrow \text{C}_2\text{H}_6 + \text{CH}_3$                   | 1.43E-25 | 4.14 | 6320.0  | 167 | $\text{I}^* \text{C}_3\text{H}_7 + \text{H} \Rightarrow \text{C}_3\text{H}_6 + \text{H}_2$          | 5.99E-12 | 0.00  | 0.0    |
| 97  | $\text{C}_2\text{H}_5 + \text{CH}_3 \Rightarrow \text{CH}_4 + \text{C}_2\text{H}_4$                   | 1.63E-12 | 0.00 | 0.0     | 168 | $\text{I}^* \text{C}_3\text{H}_7 + \text{H} \Rightarrow \text{C}_3\text{H}_8$                       | 3.32E-11 | 0.00  | 0.0    |
| 98  | $\text{C}_2\text{H}_5 + \text{CH}_3 \Rightarrow \text{C}_3\text{H}_8$                                 | 5.60E-11 | 0.00 | 0.0     | 169 | $\text{N}^* \text{C}_3\text{H}_7 + \text{OH} \Rightarrow \text{C}_3\text{H}_6 + \text{H}_2\text{O}$ | 4.00E-11 | 0.00  | 0.0    |
| 99  | $\text{C}_2\text{H}_5 + \text{CH}_2 \Rightarrow \text{C}_2\text{H}_4 + \text{CH}_3$                   | 3.01E-11 | 0.00 | 0.0     | 170 | $\text{I}^* \text{C}_3\text{H}_7 + \text{OH} \Rightarrow \text{C}_3\text{H}_6 + \text{H}_2\text{O}$ | 4.00E-11 | 0.00  | 0.0    |
| 100 | $\text{C}_2\text{H}_5 + \text{H} \Rightarrow \text{C}_2\text{H}_6$                                    | 9.04E-11 | 0.16 | 0.0     | 171 | $\text{I}^* \text{C}_3\text{H}_7 + \text{CH}_3 \Rightarrow \text{C}_4\text{H}_{10}$                 | 2.26E-09 | -0.68 | 0.0    |
| 101 | $\text{C}_2\text{H}_5 + \text{H} \Rightarrow \text{CH}_3 + \text{CH}_3$                               | 5.99E-11 | 0.00 | 0.0     | 172 | $\text{C}_3\text{H}_6 + \text{CH}_3 \Rightarrow \text{C}_4\text{H}_9$                               | 3.15E-21 | 2.67  | 3450.0 |
| 102 | $\text{C}_2\text{H}_5 + \text{H} \Rightarrow \text{C}_2\text{H}_4 + \text{H}_2$                       | 3.01E-11 | 0.00 | 0.0     | 173 | $\text{C}_4\text{H}_9 + \text{CH}_3 \Rightarrow \text{C}_5\text{H}_{12}$                            | 3.19E-10 | -0.32 | 0.0    |
| 103 | $\text{C}_2\text{H}_5 + \text{OH} \Rightarrow \text{C}_2\text{H}_6 + \text{O}$                        | 1.66E-40 | 8.80 | 250.0   | 174 | $\text{C}_3\text{H}_6 + \text{H} \Rightarrow \text{I}^* \text{C}_3\text{H}_7$                       | 7.06E-13 | 0.51  | 619.0  |
| 104 | $\text{C}_2\text{H}_5 + \text{OH} \Rightarrow \text{C}_2\text{H}_4 + \text{H}_2\text{O}$              | 4.00E-11 | 0.00 | 0.0     | 175 | $\text{C}_3\text{H}_6 + \text{H} \Rightarrow \text{N}^* \text{C}_3\text{H}_7$                       | 4.15E-13 | 0.51  | 1320.0 |
